# Supplementary material for: Quantifying Climatological Ranges and Anomalies for Pacific Coral Reef Ecosystems
Source: PLoS One. 2013 Apr 18;8(4):e61974. doi: 10.1371/journal.pone.0061974 (PMC3630142; doi:10.1371/journal.pone.0061974)
Supplement: Table S6 — Summary table of irradiance anomalies. Anomalies are summarized by year and include the annual number and average annual magnitude of both positive and negative anomalies for each of the 41 islands and atolls that comprise the coral reef ecosystems of the U.S. Pacific. Please see methods section in main text for more information pertaining to island- and atoll-scale anomaly metric development. (XLSX) [file pone.0061974.s010.xlsx]

## Sheet: Sheet1
					Annual Number of Positive Irradiance Anomaly Values (Positive IAVs)													Annual Number of Negative Irradiance Anomaly Values (Negative IAVs)
Island Code	Island	Region	Latitude	Longitude	*2002	2003	2004	2005	2006	2007	2008	2009	2010	*2011	Average Annual Number of Positive IAVs	Average Annual Anomaly (% of Time)		*2002	2003	2004	2005	2006	2007	2008	2009	2010	*2011	Average Annual Number of Negative IAVs	Average Annual Anomaly (% of Time)
KUR	Kure	Northwestern Hawaiian	28.4234	-178.331	2	5	1	3	5	5	2	4	4	0	3	6.52174		0	1	5	3	4	1	5	4	4	2	2.78334	6.05074
MID	Midway	Northwestern Hawaiian	28.2269	-177.38	4	4	2	4	2	4	5	2	6	1	3.14167	6.82972		1	1	4	2	2	1	5	2	4	1	2.19167	4.7645
PHR	Pearl & Hermes	Northwestern Hawaiian	27.8563	-175.847	4	3	2	3	4	5	5	7	5	0	3.6	7.82609		1	3	6	2	1	3	6	1	2	1	2.49167	5.41667
LIS	Lisianski	Northwestern Hawaiian	26.0092	-173.95	2	5	1	1	6	5	5	5	7	0	3.6	7.82609		2	2	3	1	2	2	5	3	5	1	2.44167	5.30798
LAY	Laysan	Northwestern Hawaiian	25.7758	-171.732	3	7	3	5	7	5	5	7	5	0	4.55	9.8913		1	1	3	1	3	0	6	2	5	2	2.23334	4.85509
MAR	Maro Reef	Northwestern Hawaiian	25.4141	-170.579	3	6	1	2	5	4	2	4	6	1	3.19167	6.93841		0	3	3	2	1	1	5	3	3	3	2.22501	4.83698
FFS	French Frigate Shoals	Northwestern Hawaiian	23.791	-166.213	0	2	3	5	3	4	1	5	7	0	3	6.52174		1	1	2	2	0	1	4	2	4	2	1.73334	3.76813
NEC	Necker	Northwestern Hawaiian	23.5757	-164.703	0	4	3	3	5	3	1	6	7	0	3.2	6.95652		1	2	3	1	4	0	4	3	5	2	2.33334	5.07248
NIH	Nihoa	Northwestern Hawaiian	23.055	-161.93	0	6	4	5	5	8	2	9	4	0	4.3	9.34783		0	4	4	1	0	1	4	2	1	2	1.78334	3.87683
KAU	Kauai	Hawaii	22.0912	-159.57	2	4	4	8	6	6	3	7	5	1	4.44167	9.6558		0	2	2	0	1	2	3	0	1	1	1.14167	2.48189
NII	Niihau	Hawaii	21.8979	-160.151	2	4	5	6	6	6	3	6	4	1	4.14167	9.00363		0	1	2	0	1	2	3	0	1	1	1.04167	2.2645
OAH	Oahu	Hawaii	21.4865	-158.003	3	5	4	4	6	4	3	4	4	0	3.55	7.71739		0	1	3	0	0	2	2	0	1	0	0.9	1.95652
MOL	Molokai	Hawaii	21.1406	-157.091	0	2	2	3	4	5	3	1	5	0	2.5	5.43478		0	2	4	1	1	3	2	0	2	1	1.54167	3.35146
LAN	Lanai	Hawaii	20.8211	-156.918	0	1	4	6	5	2	5	4	6	0	3.3	7.17391		0	2	4	1	1	3	3	0	2	1	1.64167	3.56885
MAI	Maui	Hawaii	20.8151	-156.4	1	2	3	5	1	4	4	1	4	0	2.45	5.32609		0	2	2	0	1	3	2	1	2	1	1.34167	2.91667
HAW	Hawaii	Hawaii	19.5263	-155.416	1	2	7	6	5	8	1	3	0	0	3.25	7.06522		0	2	1	1	1	4	4	2	2	0	1.7	3.69565
JOH	Johnston	Hawaii	16.7415	-169.516	0	5	8	10	4	6	3	6	7	2	4.98334	10.8333		2	0	0	0	4	2	3	4	3	0	1.7	3.69565
WAK	Wake	Mariana	19.3011	166.616	2	5	3	5	6	8	2	4	5	0	3.9	8.47826		3	4	4	3	3	1	1	2	1	1	2.09167	4.54711
FDP	Farallon de Pajaros	Mariana	20.5469	144.893	1	4	3	5	5	6	3	5	2	1	3.39167	7.3732		2	3	0	4	2	1	2	3	2	3	1.92501	4.1848
MAU	Maug	Mariana	20.0221	145.222	1	5	3	6	6	8	5	6	2	1	4.19167	9.11233		1	3	1	4	1	1	3	5	2	1	2.09167	4.54711
ASC	Asuncion	Mariana	19.6941	145.401	2	2	5	7	5	9	6	5	5	3	4.62501	10.0544		2	4	1	3	2	1	2	5	2	2	2.18334	4.74639
AGR	Agrihan	Mariana	18.7609	145.656	1	6	1	9	5	11	9	5	7	2	5.43334	11.8116		3	2	2	1	1	2	1	2	0	3	1.37501	2.98915
PAG	Pagan	Mariana	18.1103	145.757	0	3	3	8	5	10	8	3	9	1	4.94167	10.7428		1	4	2	2	4	2	2	6	3	5	2.75835	5.99641
ALA	Alamagan	Mariana	17.6029	145.825	0	2	3	4	4	10	7	2	6	2	3.88334	8.44204		4	3	4	2	2	1	1	4	2	2	2.18334	4.74639
GUG	Guguan	Mariana	17.308	145.837	0	3	0	3	4	9	5	1	5	2	3.08334	6.70291		3	4	5	2	1	2	0	4	2	2	2.23334	4.85509
SAR	Sarigan	Mariana	16.7061	145.776	0	4	2	5	5	6	4	2	4	3	3.32501	7.22828		4	8	4	6	2	4	1	5	3	3	3.62501	7.88046
SAI	Saipan	Mariana	15.1854	145.753	1	3	3	6	9	8	9	5	8	2	5.23334	11.3768		6	9	6	4	6	2	1	6	3	2	4.08334	8.87683
TIN	Tinian	Mariana	14.9916	145.632	0	2	3	4	4	7	7	5	7	1	3.94167	8.56885		8	8	7	6	7	5	2	6	3	2	4.88334	10.616
AGU	Aguijan	Mariana	14.8523	145.555	0	2	2	4	7	8	4	4	7	2	3.88334	8.44204		9	7	7	4	9	5	1	6	2	2	4.63334	10.0725
ROT	Rota	Mariana	14.1604	145.21	2	2	5	6	7	7	6	6	3	3	4.42501	9.61959		7	9	11	7	10	5	2	6	5	1	5.89167	12.808
GUA	Guam	Mariana	13.4628	144.787	1	2	5	2	4	5	6	7	4	2	3.63334	7.89857		8	7	7	6	7	4	1	7	6	1	4.94167	10.7428
KIN	Kingman	Equatorial	6.39852	-162.379	5	4	8	5	8	15	12	12	6	7	7.54169	16.395		7	10	6	14	8	7	6	5	9	2	6.93334	15.0725
PAL	Palmyra	Equatorial	5.88338	-162.086	1	5	7	1	6	6	9	10	9	6	5.60002	12.174		7	10	5	12	4	4	7	5	9	1	5.99167	13.0254
HOW	Howland	Equatorial	0.80441	-176.621	0	8	9	7	6	7	9	9	8	4	6.46668	14.058		11	6	10	3	5	7	4	8	8	1	5.69167	12.3732
BAK	Baker	Equatorial	0.19631	-176.479	0	3	1	6	5	6	9	8	3	5	4.30835	9.36598		10	6	8	5	10	7	3	8	9	1	6.14167	13.3515
JAR	Jarvis	Equatorial	-0.37374	-159.997	1	8	11	7	6	11	8	10	5	5	6.85835	14.9095		0	5	2	0	1	1	1	4	7	1	2.14167	4.6558
SWA	Swains	Samoa	-11.0562	-171.082	4	8	6	6	6	2	8	6	10	3	5.52501	12.0109		1	7	4	6	3	7	3	2	2	1	3.49167	7.59059
OFU	Ofu & Olosega	Samoa	-14.1736	-169.649	5	8	11	10	4	4	13	11	7	3	7.17501	15.5978		0	3	6	1	5	5	9	4	3	1	3.64167	7.91667
TAU	Tau	Samoa	-14.239	-169.469	5	11	12	13	9	4	14	10	8	4	8.51668	18.5145		1	4	4	3	4	7	5	5	5	1	3.79167	8.24276
TUT	Tutuila	Samoa	-14.2972	-170.695	3	6	9	7	9	7	9	6	6	3	6.17501	13.4239		0	3	2	3	2	4	4	5	3	1	2.64167	5.74276
ROS	Rose	Samoa	-14.546	-168.156	4	7	11	9	2	5	10	13	7	2	6.68334	14.529		3	4	6	5	7	6	10	7	3	0	4.95	10.7609
					Annual Average Positive Irradiance Anomaly Value (Positive IAV; Einsteins m-2 d-1)													Annual Average Negative Irradiance Anomaly Value (Negative IAV; Einsteins m-2 d-1)
Island Code	Island	Region	Latitude	Longitude	*2002	2003	2004	2005	2006	2007	2008	2009	2010	*2011	Average Annual Positive IAV			*2002	2003	2004	2005	2006	2007	2008	2009	2010	*2011	Average Annual Negative IAV
KUR	Kure	Northwestern Hawaiian	28.4234	-178.331	0.774697	2.3471	2.38691	1.70564	0.875041	0.881673	1.12706	2.14156	2.1669	NaN	1.60073			NaN	-6.2817	-2.99844	-1.91811	-2.14591	-1.32254	-3.01396	-1.20313	-2.38751	-0.692317	-2.4404
MID	Midway	Northwestern Hawaiian	28.2269	-177.38	1.32276	2.29193	0.312391	1.71323	0.363979	1.39767	0.98815	1.59117	1.72266	0.24062	1.19446			-1.46792	-7.44978	-3.84535	-3.92594	-1.42692	-3.5284	-3.02649	-1.57811	-2.97453	-0.897869	-3.01213
PHR	Pearl & Hermes	Northwestern Hawaiian	27.8563	-175.847	0.748614	1.89881	0.894753	0.852351	1.83613	1.43961	1.10839	1.32963	2.0003	NaN	1.3454			-2.28099	-3.21766	-1.74111	-0.752657	-1.05387	-1.36069	-2.71724	-0.919019	-1.99773	-1.87092	-1.79119
LIS	Lisianski	Northwestern Hawaiian	26.0092	-173.95	0.662149	1.22601	0.530632	0.775206	0.832352	1.56415	1.32457	1.16831	1.87027	NaN	1.10596			-1.20273	-4.15803	-2.74516	-2.69356	-1.32808	-2.04159	-2.15703	-0.933009	-3.19115	-4.45335	-2.49037
LAY	Laysan	Northwestern Hawaiian	25.7758	-171.732	0.96256	1.67417	1.52353	1.55901	1.57948	0.919507	1.45794	1.24409	1.84539	NaN	1.41841			-0.863219	-0.156935	-3.5288	-3.87547	-1.65539	NaN	-2.75751	-2.70954	-3.11282	-2.13407	-2.31042
MAR	Maro Reef	Northwestern Hawaiian	25.4141	-170.579	0.872286	1.65608	0.671404	0.690435	0.55084	0.948052	1.09354	1.14055	1.1144	0.248337	0.898592			NaN	-1.22009	-4.84356	-0.560841	-1.19592	-1.26064	-2.92378	-2.96762	-6.5321	-4.60945	-2.90155
FFS	French Frigate Shoals	Northwestern Hawaiian	23.791	-166.213	NaN	1.54802	0.567347	0.73889	0.846841	0.740972	0.423421	0.993871	0.737819	NaN	0.824647			-0.541507	-1.38207	-4.28772	-0.745189	NaN	-0.532877	-4.82139	-0.256229	-5.42462	-5.03771	-2.55881
NEC	Necker	Northwestern Hawaiian	23.5757	-164.703	NaN	0.335023	0.689651	0.635246	0.531863	0.589745	0.38841	0.423116	0.734664	NaN	0.540965			-1.29441	-1.49102	-3.41946	-0.411161	-1.39006	NaN	-4.57837	-0.683226	-3.09225	-4.5643	-2.32492
NIH	Nihoa	Northwestern Hawaiian	23.055	-161.93	NaN	0.969211	1.87557	1.03127	1.14751	0.654903	1.53675	1.0677	0.94689	NaN	1.15372			NaN	-3.15708	-2.60306	-0.118358	NaN	-3.20042	-3.86153	-3.20038	-3.69115	-5.93467	-3.22083
KAU	Kauai	Hawaii	22.0912	-159.57	0.596023	1.25968	0.986509	1.05254	1.03873	1.3041	1.36129	1.00792	1.08158	0.732792	1.04212			NaN	-5.91313	-6.55808	NaN	-7.22868	-4.81931	-4.54701	NaN	-2.41688	-0.552335	-4.57649
NII	Niihau	Hawaii	21.8979	-160.151	0.470547	0.577355	1.47977	0.966074	1.25841	1.09216	0.699116	1.12891	0.966147	0.294147	0.893263			NaN	-9.85658	-9.53982	NaN	-2.37868	-2.61452	-6.0009	NaN	-0.165874	-2.98066	-4.79101
OAH	Oahu	Hawaii	21.4865	-158.003	0.500513	1.08549	0.434036	1.19688	1.33504	1.11714	0.332565	0.621565	0.650045	NaN	0.808141			NaN	-8.79166	-1.90191	NaN	NaN	-3.71254	-4.39661	NaN	-1.23594	NaN	-4.00773
MOL	Molokai	Hawaii	21.1406	-157.091	NaN	0.619655	0.92847	1.08408	0.921237	0.857959	0.268717	0.0196571	0.986326	NaN	0.710763			NaN	-3.96619	-3.99224	-0.0757419	-8.1292	-3.73135	-2.82809	NaN	-2.13614	-1.05235	-3.23891
LAN	Lanai	Hawaii	20.8211	-156.918	NaN	1.80788	0.228304	0.931588	1.05769	1.80415	0.233149	0.733591	0.693087	NaN	0.936179			NaN	-4.65665	-3.4918	-0.158833	-4.57651	-3.54967	-1.81741	NaN	-2.20636	-2.70157	-2.89485
MAI	Maui	Hawaii	20.8151	-156.4	0.433085	0.015145	1.00745	0.786979	1.0678	0.75376	1.01963	0.554485	1.1483	NaN	0.754071			NaN	-6.14811	-2.34994	NaN	-4.17743	-4.86838	-3.4185	-0.27858	-2.1428	-3.30628	-3.33625
HAW	Hawaii	Hawaii	19.5263	-155.416	0.350087	2.93533	1.50398	0.88113	0.975815	1.62991	3.34556	0.452758	NaN	NaN	1.50932			NaN	-5.84699	-2.31398	-0.945206	-0.867697	-2.96004	-4.35787	-2.71472	-2.12601	NaN	-2.76656
JOH	Johnston	Hawaii	16.7415	-169.516	NaN	1.14186	0.911801	1.06804	0.935011	0.998268	1.3179	1.14972	0.936479	1.21872	1.07531			-4.04903	NaN	NaN	NaN	-4.77211	-3.09633	-2.62202	-3.69843	-5.66211	NaN	-3.98334
WAK	Wake	Mariana	19.3011	166.616	0.398394	1.05858	0.48725	1.30814	1.16861	0.885656	1.76564	1.30353	1.50937	NaN	1.09835			-1.36985	-2.03181	-4.63669	-1.81792	-0.904062	-1.95932	-1.99022	-1.84001	-4.04693	-0.504873	-2.11017
FDP	Farallon de Pajaros	Mariana	20.5469	144.893	0.608442	1.03528	1.38359	0.912465	0.780892	0.534194	1.27934	1.19441	0.685725	0.982058	0.939639			-1.01546	-2.41969	NaN	-1.66573	-2.19604	-1.56249	-5.5853	-7.47628	-4.36556	-3.64922	-3.3262
MAU	Maug	Mariana	20.0221	145.222	0.556194	1.16854	0.902572	0.74166	1.13667	1.2849	1.37837	0.926047	1.07581	0.47996	0.965073			-1.76484	-3.51593	-1.47664	-4.4674	-4.51629	-3.79402	-2.47728	-4.85196	-1.57596	-3.26116	-3.17015
ASC	Asuncion	Mariana	19.6941	145.401	1.41126	1.3662	0.925209	2.00077	1.51835	1.53961	1.00065	1.29427	1.17258	0.894551	1.31235			-3.72593	-4.95632	-0.661559	-4.61296	-0.727134	-3.79126	-0.381118	-2.78799	-5.30675	-5.48781	-3.24388
AGR	Agrihan	Mariana	18.7609	145.656	0.974972	1.44316	2.09739	1.88651	2.0669	1.50331	1.66013	1.68367	1.67913	0.779378	1.57746			-0.683075	-10.9731	-2.52178	-10.4253	-0.698001	-0.438662	-7.79052	-1.78225	NaN	-0.589094	-3.98908
PAG	Pagan	Mariana	18.1103	145.757	NaN	1.44936	0.974928	1.02094	0.956848	1.16123	1.11392	0.819132	0.796491	0.63514	0.992			-3.3405	-3.76751	-5.41677	-4.27055	-3.70173	-4.16436	-3.4406	-2.5289	-0.563149	-4.00842	-3.52025
ALA	Alamagan	Mariana	17.6029	145.825	NaN	1.00286	1.00469	0.989048	1.07741	0.819269	0.94733	1.38839	0.601199	0.301069	0.903473			-3.84586	-6.32579	-2.48231	-3.6478	-2.47031	-0.862408	-1.51028	-5.67562	-3.17487	-4.9261	-3.49213
GUG	Guguan	Mariana	17.308	145.837	NaN	1.11515	NaN	0.894967	1.0423	0.692554	0.925365	1.86085	0.594816	1.23326	1.04491			-1.06385	-4.11377	-2.10081	-1.78697	-4.25432	-1.70448	NaN	-6.4515	-0.689902	-5.38276	-3.06093
SAR	Sarigan	Mariana	16.7061	145.776	NaN	0.730883	0.119978	0.503378	1.04937	0.806168	0.809278	1.46907	0.413603	1.31304	0.80164			-5.11598	-4.1112	-2.93212	-2.30614	-1.33226	-3.15407	-3.43076	-6.77107	-2.66371	-2.22428	-3.40416
SAI	Saipan	Mariana	15.1854	145.753	0.80559	1.30822	1.70359	1.09953	0.955567	0.964375	1.26313	1.50329	0.970667	1.12624	1.17002			-4.46087	-1.72519	-5.14095	-4.92042	-4.99439	-5.95511	-3.06206	-4.46426	-2.7567	-0.304836	-3.77848
TIN	Tinian	Mariana	14.9916	145.632	NaN	1.70292	1.42781	1.80075	0.809015	0.912459	0.925461	1.23699	1.56345	1.26763	1.29405			-4.48691	-2.89089	-4.52021	-3.28522	-4.86443	-2.48989	-2.5712	-6.3556	-3.2255	-2.02408	-3.67139
AGU	Aguijan	Mariana	14.8523	145.555	NaN	0.567529	0.879671	1.11241	0.615308	0.777986	1.02286	0.995329	1.07057	1.05405	0.899523			-2.53541	-3.22696	-3.72374	-4.74113	-4.06819	-1.86992	-3.0187	-4.8302	-4.76192	-2.11141	-3.48876
ROT	Rota	Mariana	14.1604	145.21	0.351566	0.667496	0.778054	0.914037	0.735378	1.26441	0.965841	1.29395	1.00986	0.359576	0.834017			-4.84437	-3.49271	-2.30103	-2.69282	-4.52387	-2.08857	-4.39929	-3.48978	-3.6443	-2.06368	-3.35404
GUA	Guam	Mariana	13.4628	144.787	1.43205	1.61013	1.03506	0.251289	0.923847	0.579278	1.26702	1.46595	1.1101	1.48692	1.11616			-3.72543	-3.63181	-4.26095	-3.0853	-3.75644	-4.13165	-1.31002	-3.68393	-4.21207	-6.61844	-3.8416
KIN	Kingman	Equatorial	6.39852	-162.379	2.14774	1.90239	2.19727	2.20846	2.68475	3.72887	2.2248	2.1991	4.0466	3.67855	2.70185			-4.78155	-6.40945	-3.74905	-3.4696	-3.778	-3.01078	-4.64637	-5.24683	-3.65617	-3.88765	-4.26355
PAL	Palmyra	Equatorial	5.88338	-162.086	0.524583	2.18973	1.95381	1.1335	3.50739	2.88549	1.93849	1.85063	2.63689	2.9492	2.15697			-4.46509	-6.93821	-2.78512	-4.35714	-5.10049	-5.5548	-2.95588	-4.54678	-4.33548	-0.546391	-4.15854
HOW	Howland	Equatorial	0.80441	-176.621	NaN	0.628345	0.727998	1.02665	0.933914	1.04703	0.975676	0.959016	1.06849	1.72862	1.01064			-7.31223	-5.30945	-3.80799	-8.47116	-6.96148	-4.55701	-0.331214	-4.30498	-9.64025	-3.89957	-5.45953
BAK	Baker	Equatorial	0.19631	-176.479	NaN	0.350161	0.0296111	0.860539	1.23513	0.760378	0.614052	0.616713	0.638289	1.23238	0.704139			-6.69025	-5.70389	-2.90342	-3.12727	-3.01499	-3.70095	-1.08926	-4.79712	-9.26433	-1.19803	-4.14895
JAR	Jarvis	Equatorial	-0.37374	-159.997	0.182457	0.406502	0.805518	0.530737	1.30846	0.530266	0.864848	0.790426	0.425004	0.672684	0.65169			NaN	-1.29892	-2.54826	NaN	-2.13518	-0.64397	-0.62392	-1.53064	-7.406	-0.753558	-2.11756
SWA	Swains	Samoa	-11.0562	-171.082	2.437	1.58638	2.23371	2.29597	3.29702	1.6873	2.5709	1.95293	1.94862	3.04552	2.30553			-1.19104	-4.01084	-5.84849	-3.43576	-6.05798	-1.67737	-4.59241	-3.65641	-1.18251	-19.4225	-5.10753
OFU	Ofu & Olosega	Samoa	-14.1736	-169.649	4.39288	3.11194	4.78159	4.27766	2.97801	1.25012	3.62609	2.00353	2.06342	2.89411	3.13793			NaN	-2.05203	-3.07721	-7.93601	-3.7223	-3.37429	-4.15197	-2.67703	-4.32682	-10.1583	-4.60844
TAU	Tau	Samoa	-14.239	-169.469	6.31757	4.3332	5.47934	3.91515	2.15957	2.28747	5.41054	3.23304	2.90655	4.08636	4.01288			-1.14179	-1.49005	-3.70641	-3.09166	-3.96093	-2.40267	-5.53083	-2.09809	-2.21221	-8.5051	-3.41397
TUT	Tutuila	Samoa	-14.2972	-170.695	4.54605	4.77226	4.08803	2.16808	1.91397	3.40484	3.7908	2.01545	2.19853	2.23908	3.11371			NaN	-1.15954	-2.77863	-3.66992	-6.86007	-3.88022	-2.6251	-3.01683	-3.16529	-4.52105	-3.51963
ROS	Rose	Samoa	-14.546	-168.156	3.3518	2.84162	3.36449	3.49932	3.98476	2.72452	2.42532	3.83867	2.92437	3.939	3.28939			-5.57725	-4.39953	-2.39066	-1.85531	-4.23336	-4.22857	-2.92533	-3.21771	-1.0692	NaN	-3.32188
*Indicates partial year of data.
